# Supplementary material for: Deep removal of trace C2H2 and CO2 from C2H4 by using customized potassium-exchange mordenite
Source: Royal Society of Chemistry journal article supplement (doi:10.1039/d3sc02147e), 2023-01-01
Supplement: d3sc02147e1.pdf [file d3sc02147e1.pdf]

## ***Supporting Information***

### **Deep removal of trace C<sub>2</sub>H<sub>2</sub> and CO<sub>2</sub> from C<sub>2</sub>H<sub>4</sub> by a customized potassium exchange mordenite**

Hongwei Chen,<sup>†a</sup> Binyu Wang,<sup>†b</sup> Bin Zhang,<sup>c</sup> JiuHong Chen,<sup>a</sup> Jiabao Gui,<sup>a</sup> Xiufeng Shi,<sup>c</sup> Wenfu Yan,<sup>b</sup> Jinping Li,<sup>a</sup> and Libo Li<sup>\*a</sup>

<sup>a</sup> College of Chemical Engineering and Technology, Shanxi Key Laboratory of Gas Energy Efficient and Clean Utilization, Taiyuan University of Technology, Taiyuan 030024, China.

<sup>b</sup> State Key Laboratory of Inorganic Synthesis and Preparative Chemistry, College of Chemistry, Jilin University, 2699 Qianjin Street, Changchun 130012, China.

<sup>c</sup> College of Chemistry, Taiyuan University of Technology, Taiyuan 030024, China.

\*Corresponding Author.†These authors contributed equally.

E-mail: lilibo@tyut.edu.cn (Libo Li)

*This Supporting Information Includes:*

Details for experiments, characterizations and calculations

Tables S1-S6

Figures S1-S24

## Materials

All chemical reagents used were of analytical grade and without further purification.

**Table S1.** Reagents information.

| Name                | Chemical formula    | Manufacturer                                      | Purity | Mass   |
|---------------------|---------------------|---------------------------------------------------|--------|--------|
| Ammonium chloride   | NH <sub>4</sub> Cl  | Innochem Co., Ltd.                                | AR     | 500 g  |
| Potassium chloride  | KCl                 | Innochem Co., Ltd.                                | AR     | 500 g  |
| Cesium chloride     | CsCl                | Innochem Co., Ltd.                                | AR     | 500 g  |
| Magnesium chloride  | MgCl <sub>2</sub>   | Innochem Co., Ltd.                                | AR     | 500 g  |
| Calcium chloride    | CaCl <sub>2</sub>   | Innochem Co., Ltd.                                | AR     | 500 g  |
| Strontium chloride  | SrCl <sub>2</sub>   | Innochem Co., Ltd.                                | AR     | 500 g  |
| Barium Chloride     | BaCl <sub>2</sub>   | Innochem Co., Ltd.                                | AR     | 500 g  |
| Silica sol          | SiO <sub>2</sub>    | Luoyang JALON Micro-nano New Materials Co., Ltd   | 30wt%  | 30 kg  |
| Sodium hydroxide    | NaOH                | China National Pharmaceutical Group Corporation   | AR     | 500 g  |
| Potassium hydroxide | KOH                 | Shanghai Aladdin Biochemical Technology Co., Ltd. | AR     | 500 g  |
| Sodium aluminate    | NaAlO <sub>2</sub>  | China National Pharmaceutical Group Corporation   | AR     | 500 g  |
| Potassium aluminate | KAlO <sub>2</sub>   | Guangdong Wengjiang Chemical Reagent Co., Ltd.    | 30wt%  | 500 mL |
| Aluminium hydroxide | Al(OH) <sub>3</sub> | Innochem Co., Ltd.                                | AR     | 250 g  |
| Deionized water     | H <sub>2</sub> O    | China National Pharmaceutical Group Corporation   | -      | 25 kg  |
| COM-MOR             | MOR                 | Zhuoran Environmental Protection (Dalian) Co.,Ltd | >99%   | 100 g  |

### Large-scale synthesis of N-MOR

A 10 L reactor was used to synthesize a large-scale N-MOR. First, 101.5 g NaOH and 101.5 g NaAlO<sub>2</sub> were mixed with 4706 g deionized water in a plastic beaker with vigorous stirring. The resulting mixture was further stirred at 298 K for 30 minutes. Next, in another plastic beaker, 2837 g of 30 wt% silica sol were mixed with vigorous stirring at room temperature for 4 hours to achieve a homogeneous slurry. Finally, the slurry was transferred to the autoclave and statically crystallized at 453 K for 3 days.

**Table S2.** The information of the prepared samples.

| <b>Name</b>            | <b>Salt</b>        | <b>Con.<br/>(mol/L)</b> | <b>Solid/Liquid</b> | <b>Temp<br/>(K)</b> | <b>Time<br/>(h)</b> |
|------------------------|--------------------|-------------------------|---------------------|---------------------|---------------------|
| Li-MOR-1               | LiCl               | 1                       | 1 g/50 mL           | 298                 | 4                   |
| K-MOR-1                | KCl                | 1                       | 1 g/50 mL           | 298                 | 4                   |
| Cs-MOR-1               | CsCl               | 1                       | 1 g/50 mL           | 298                 | 4                   |
| Mg-MOR-1               | MgCl <sub>2</sub>  | 1                       | 1 g/50 mL           | 298                 | 4                   |
| Ca-MOR-1               | BaCl <sub>2</sub>  | 1                       | 1 g/50 mL           | 298                 | 4                   |
| Sr-MOR-1               | SrCl <sub>2</sub>  | 1                       | 1 g/50 mL           | 298                 | 4                   |
| Ba-MOR-Ex-1            | BaCl <sub>2</sub>  | 1                       | 1 g/50 mL           | 298                 | 4                   |
| NH <sub>4</sub> -MOR-1 | NH <sub>4</sub> Cl | 1                       | 1 g/50 mL           | 298                 | 4                   |
| K-MOR-0.01             | KCl                | 0.01                    | 1 g/50 mL           | 298                 | 4                   |
| K-MOR-0.03             | KCl                | 0.03                    | 1 g/50 mL           | 298                 | 4                   |
| K-MOR-0.05             | KCl                | 0.05                    | 1 g/50 mL           | 298                 | 4                   |
| K-MOR-0.07             | KCl                | 0.07                    | 1 g/50 mL           | 298                 | 4                   |
| K-MOR-0.1              | KCl                | 0.1                     | 1 g/50 mL           | 298                 | 4                   |
| K-MOR-0.25             | KCl                | 0.25                    | 1 g/50 mL           | 298                 | 4                   |
| K-MOR-0.5              | KCl                | 0.5                     | 1 g/50 mL           | 298                 | 4                   |
| K-MOR-0.75             | KCl                | 0.75                    | 1 g/50 mL           | 298                 | 4                   |
| K-MOR-1                | KCl                | 1                       | 1 g/50 mL           | 298                 | 4                   |
| K-MOR-1.25             | KCl                | 1.25                    | 1 g/50 mL           | 298                 | 4                   |
| K-MOR-1.5              | KCl                | 1.5                     | 1 g/50 mL           | 298                 | 4                   |
| K-MOR-1.75             | KCl                | 1.75                    | 1 g/50 mL           | 298                 | 4                   |
| K-MOR-2                | KCl                | 2                       | 1 g/50 mL           | 298                 | 4                   |
| 2*-K-MOR-1             | KCl                | 1                       | 1 g/50 mL           | 298                 | 4                   |
| 3*-K-MOR-1             | KCl                | 1                       | 1 g/50 mL           | 298                 | 4                   |
| 4*-K-MOR-1             | KCl                | 1                       | 1 g/50 mL           | 298                 | 4                   |

[\*] Times of ions exchanged under the same conditions.

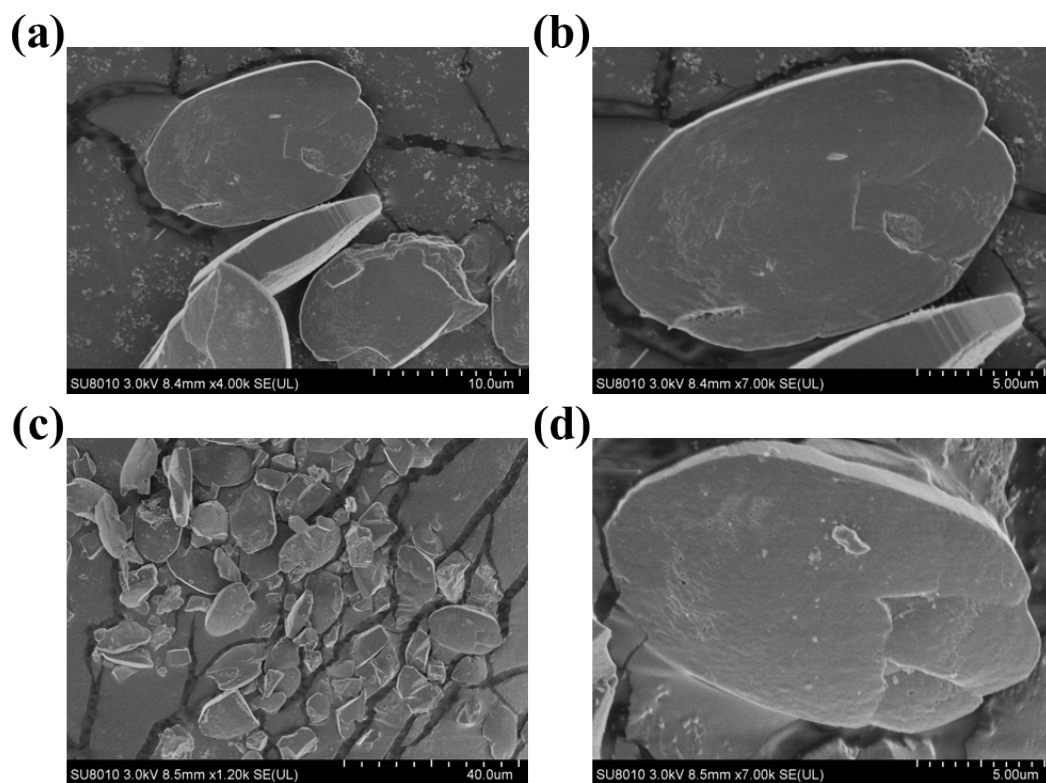

**Fig. S1.** The SEM images of (a-b) N-MOR and (c-d) K-MOR-1.

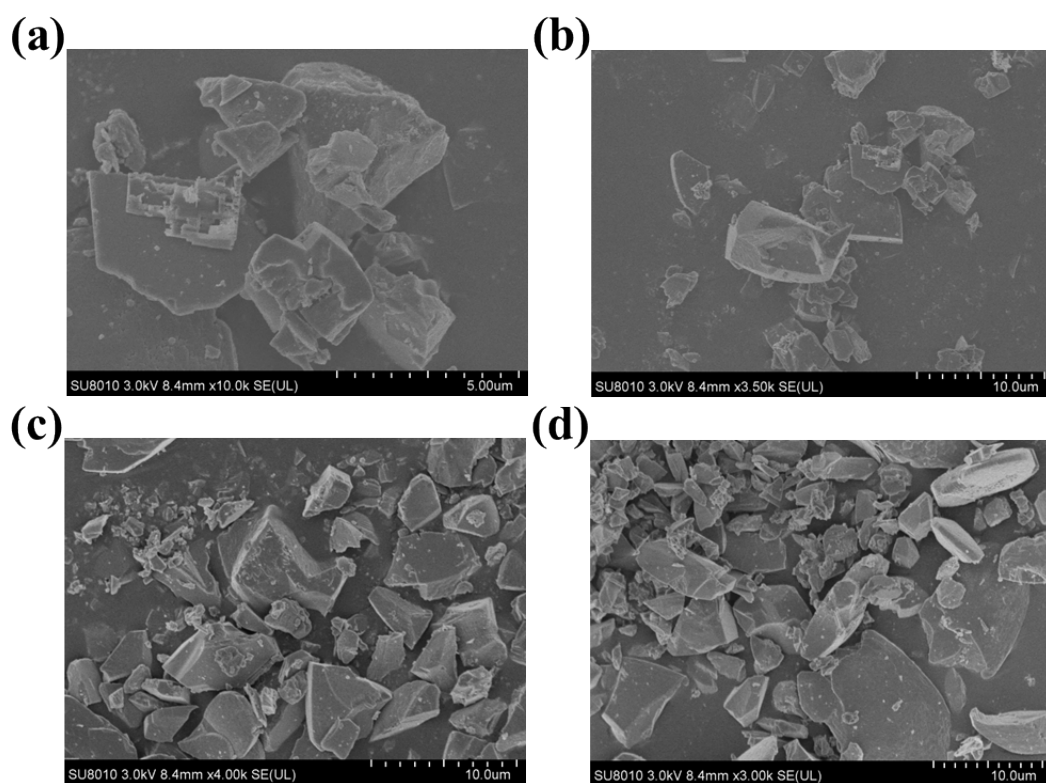

**Fig. S2.** The SEM images of (a-b) Li-MOR-1 and (c-d) Cs-MOR-1.

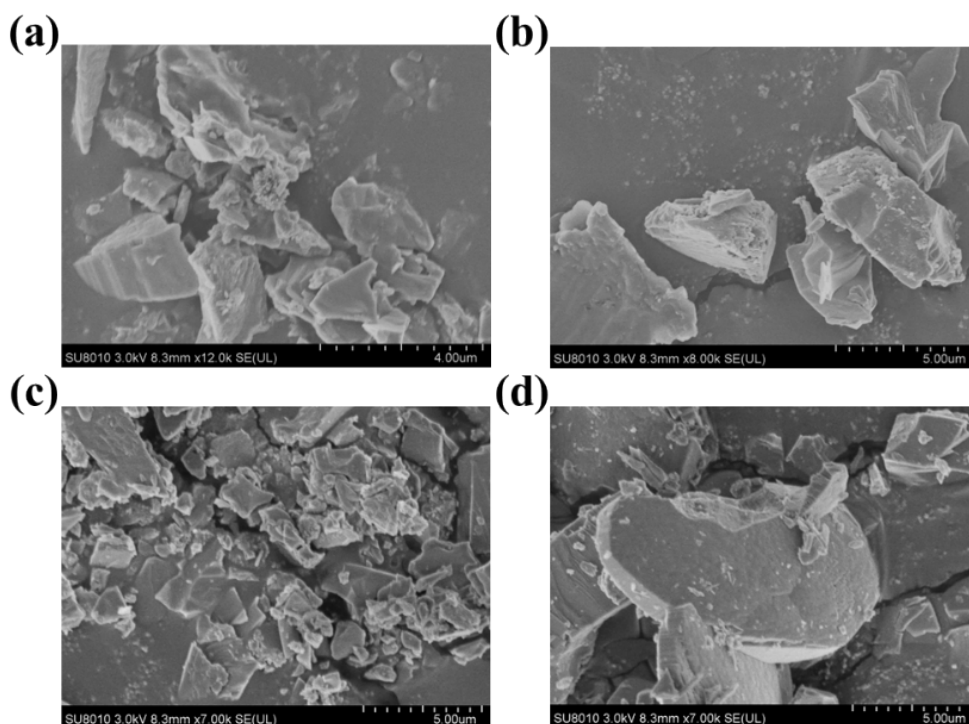

**Fig. S3.** The SEM images of (a-b) Sr-MOR-1 and (c-d) Ba-MOR-1.

## Thermogravimetric analysis

Thermal stability was evaluated by conducting thermogravimetric (TG) analysis on an STA449F5 instrument with a constant flow of nitrogen, while the sample was heated at a rate of 10 K/min.

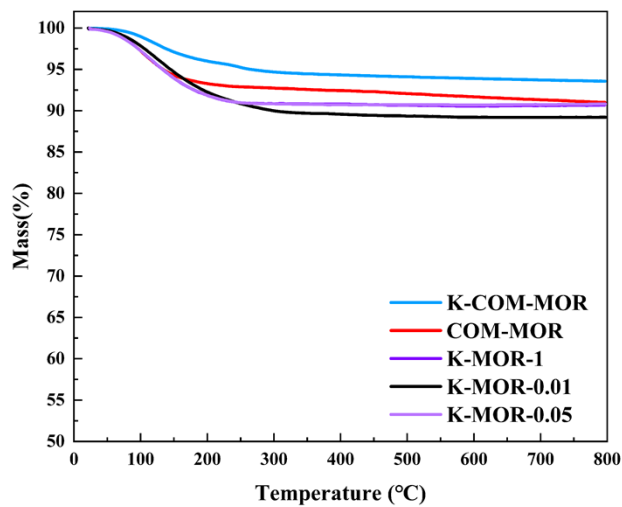

**Fig. S4.** TG curves.

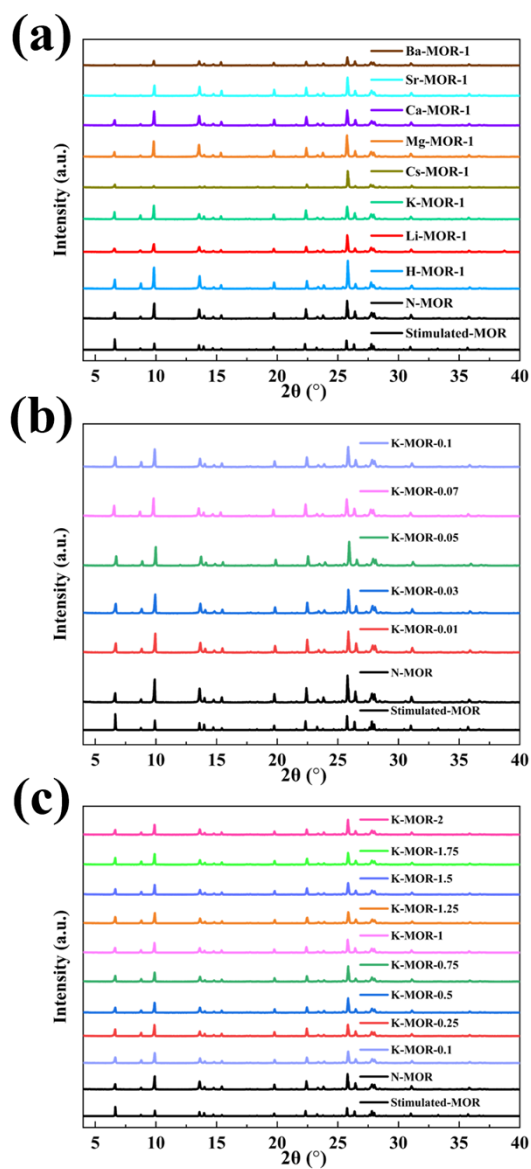

**Fig. S5.** (a) Simulated XRD pattern and experimental XRD patterns of N-XRD and M-MOR, (b-c) Simulated XRD pattern and experimental XRD patterns of K-MOR-X and N-MOR.

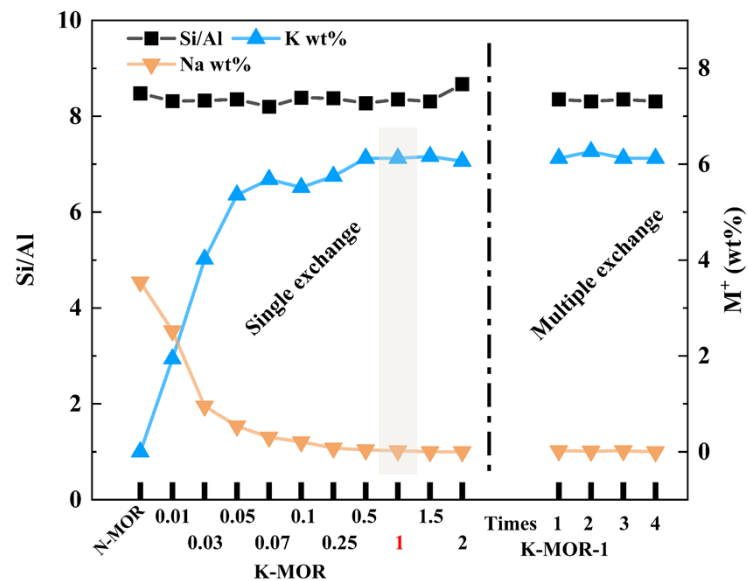

Fig. S6. Element analysis by ICP.

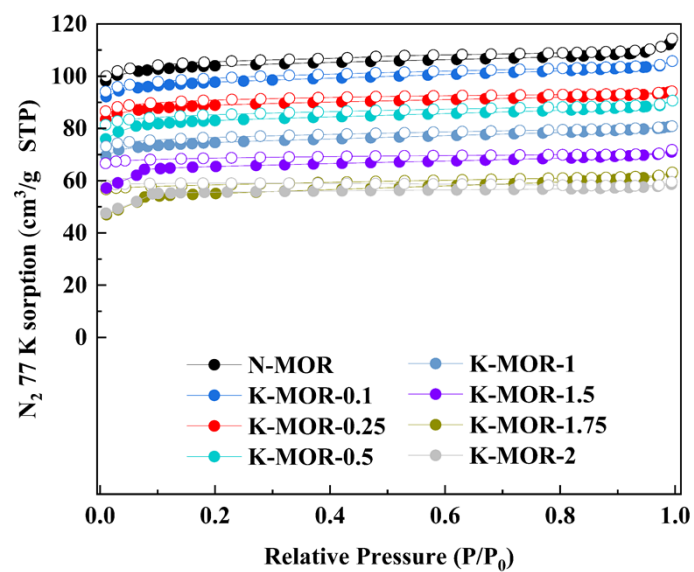

Fig. S7. N<sub>2</sub> sorption isotherms (77 K) of K-MOR-X (X = 0.1, 0.25, 0.5, 1, 1.5, 1.75, and 2) and N-MOR.

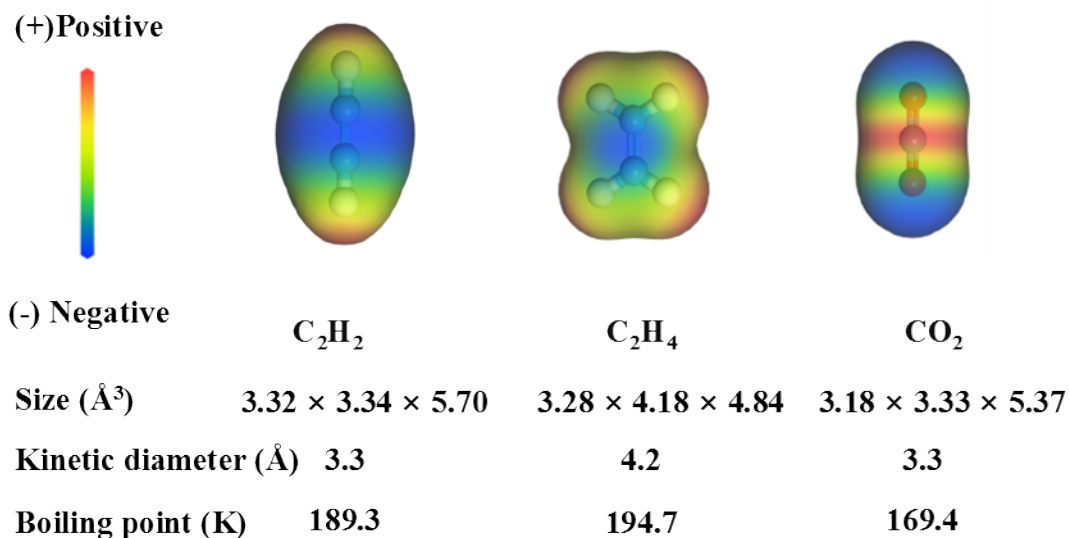

Fig. S8. Information of guest molecules and electrostatic potential distribution.

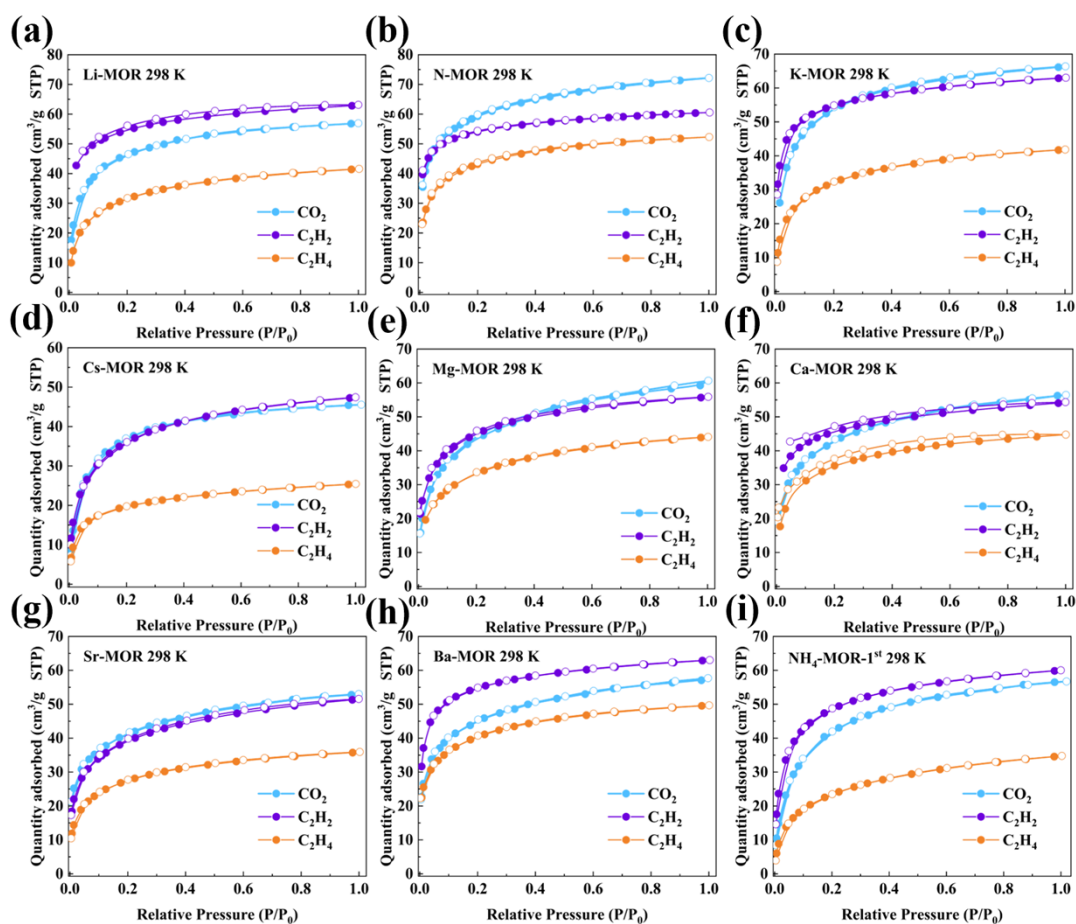

Fig. S9. Single component sorption isotherms of  $CO_2$ ,  $C_2H_2$ , and  $C_2H_4$  on M-MOR at 298 K.



### Sample stability characterization

The samples were subjected to exposure to air and immersion in water. The structural integrity of the samples was evaluated using XRD, while their adsorption properties were characterized using ASAP 2020. Different pH values were achieved by preparing solutions with different concentrations of NaOH and HNO<sub>3</sub> aqueous solutions. Subsequently, 1 g of sample was added to 50 mL of the solution and stirred for 48 hours. The structural integrity of the solution was characterized using XRD, while the adsorption properties were evaluated using ASAP 2020. Before adsorption, the samples (1.0 g) were ion-exchanged using the KCl aqueous solution (1 mol/L, 50 mL) at 353 K for 8 hours under vigorous stirring to compensate for changes in equilibrium ions arising from pH variability.

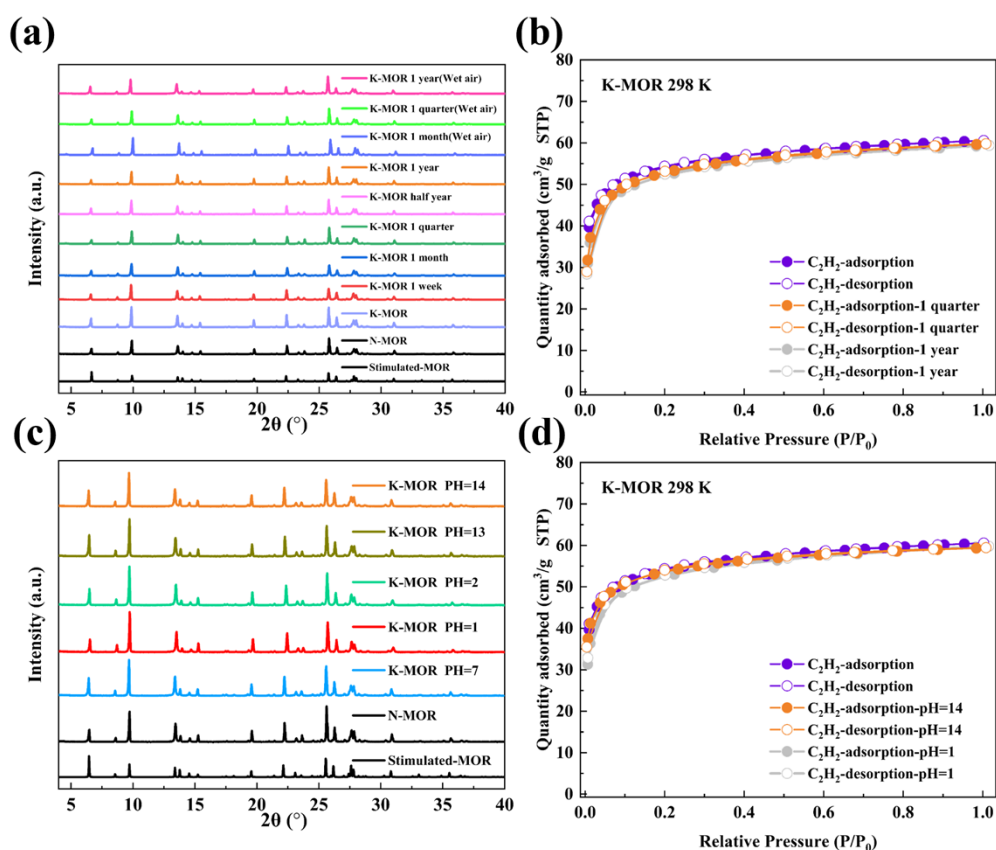

**Fig. S10.** (a) XRD patterns of K-MOR soaked in different wet conditions and (b) sorption isotherms of  $C_2H_2$ , (c) XRD patterns of K-MOR soaked in different pH solutions and (d) sorption isotherms of  $C_2H_2$ .

## Dual-site Langmuir-Freundlich isotherm model

The uptake of C<sub>2</sub>H<sub>2</sub> and C<sub>2</sub>H<sub>4</sub> was described using a dual-site Langmuir isotherm model, which is formulated as:

$$q = \frac{q_c \times k_c \times P^{n_c}}{1 + k_c \times P^{n_c}} + \frac{q_i \times k_i \times P^{n_i}}{1 + k_i \times P^{n_i}}$$

The double-site Langmuir model involves parameters such as  $q_c$  (cm<sup>3</sup> g<sup>-1</sup>) and  $q_i$  (cm<sup>3</sup> g<sup>-1</sup>), which represent the saturation capacities of sites  $c$  and  $i$ ; as well as  $k_c$  and  $k_i$ , which are the corresponding adsorption equilibrium constants that reflect the affinity coefficients of sites  $c$  and  $i$ , respectively. The model is based on the equilibrium pressure, which is denoted as  $P$ .

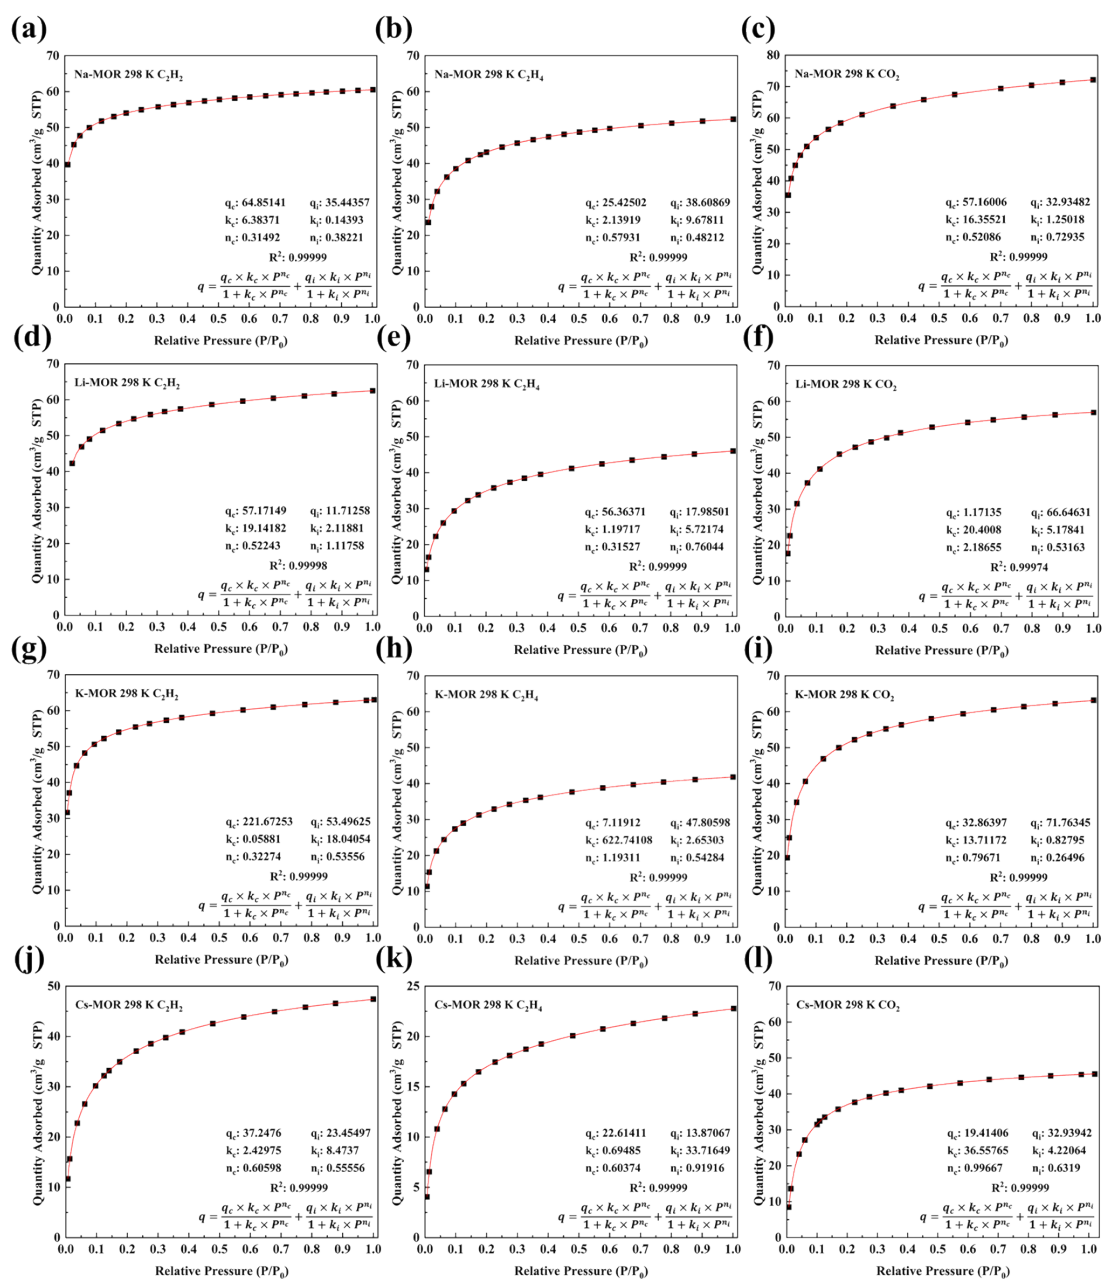

**Fig. S11.** Non-linear fitted curves for the C<sub>2</sub>H<sub>2</sub>, C<sub>2</sub>H<sub>4</sub>, and CO<sub>2</sub> sorption of (a-c) N-MOR, (d-f) Li-MOR, (g-i) K-MOR, and (j-l) Cs-MOR.

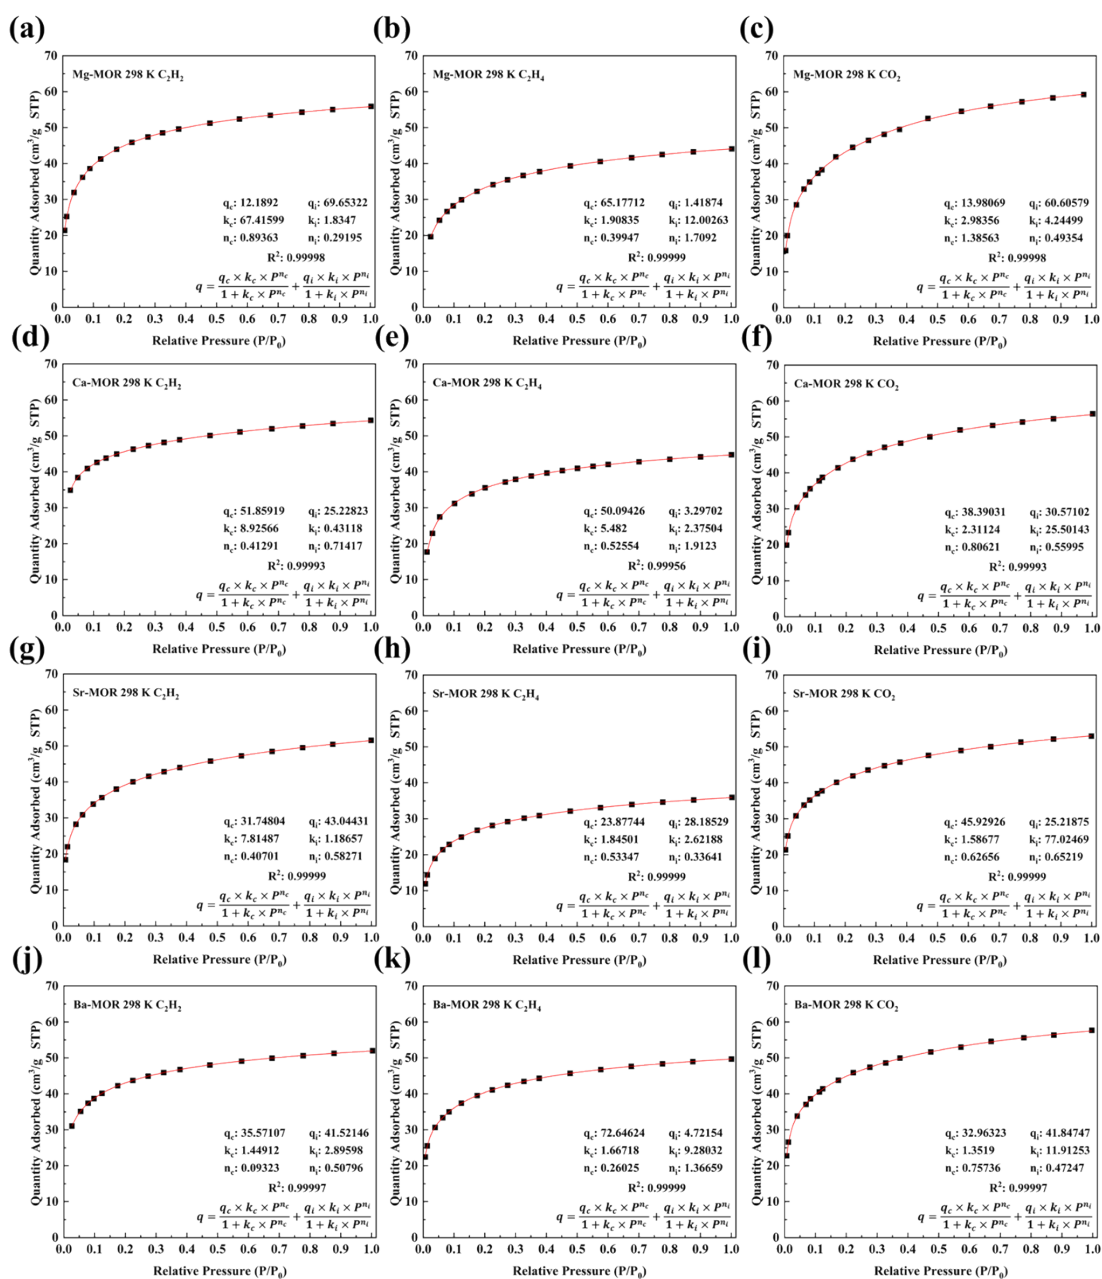

**Fig. S12.** Non-linear fitted curves for the C<sub>2</sub>H<sub>2</sub>, C<sub>2</sub>H<sub>4</sub>, and CO<sub>2</sub> sorption of (a-c) Mg-MOR, (d-f) Ca-MOR, (g-i) Sr-MOR, and (j-l) Ba-MOR.

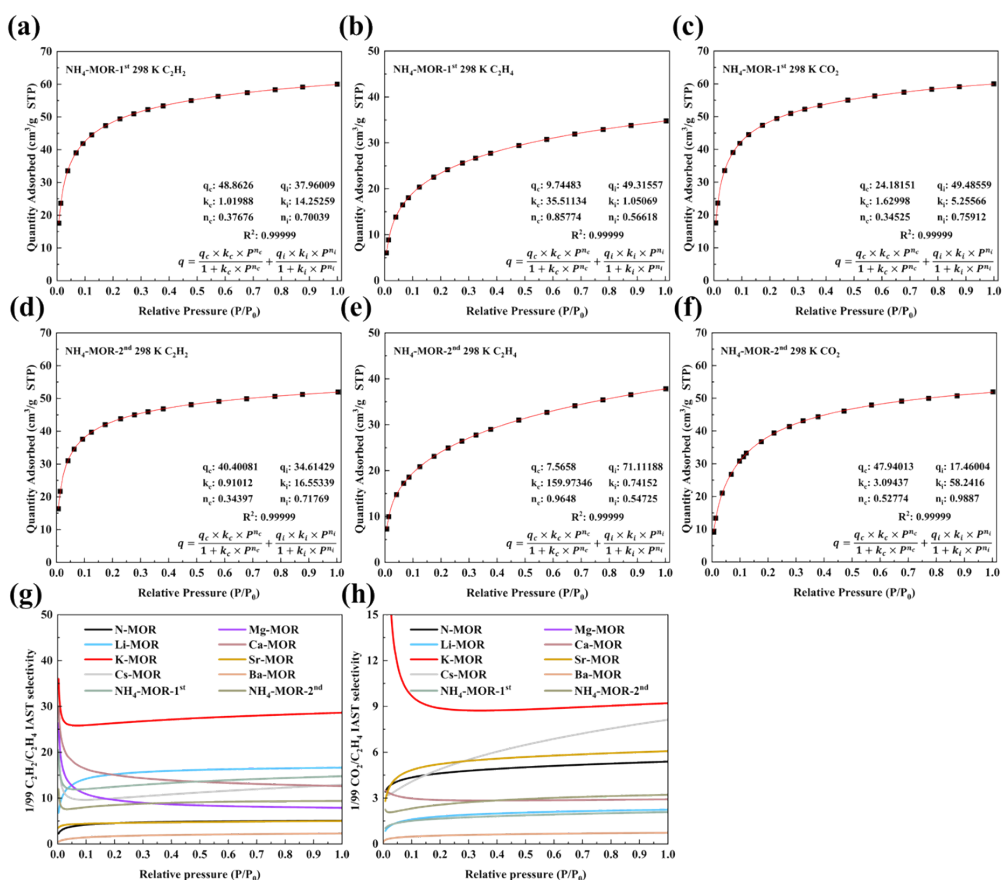

**Fig. S13.** Non-linear fitted curves for the  $\text{C}_2\text{H}_2$ ,  $\text{C}_2\text{H}_4$ , and  $\text{CO}_2$  sorption of (a-c)  $\text{NH}_4\text{-MOR-1}^{\text{st}}$ , (d-f)  $\text{NH}_4\text{-MOR-2}^{\text{nd}}$ . IAST selectivity for M-MOR on (g) 1/99  $\text{C}_2\text{H}_2/\text{C}_2\text{H}_4$  and (h) 1/99  $\text{CO}_2/\text{C}_2\text{H}_4$  mixture.

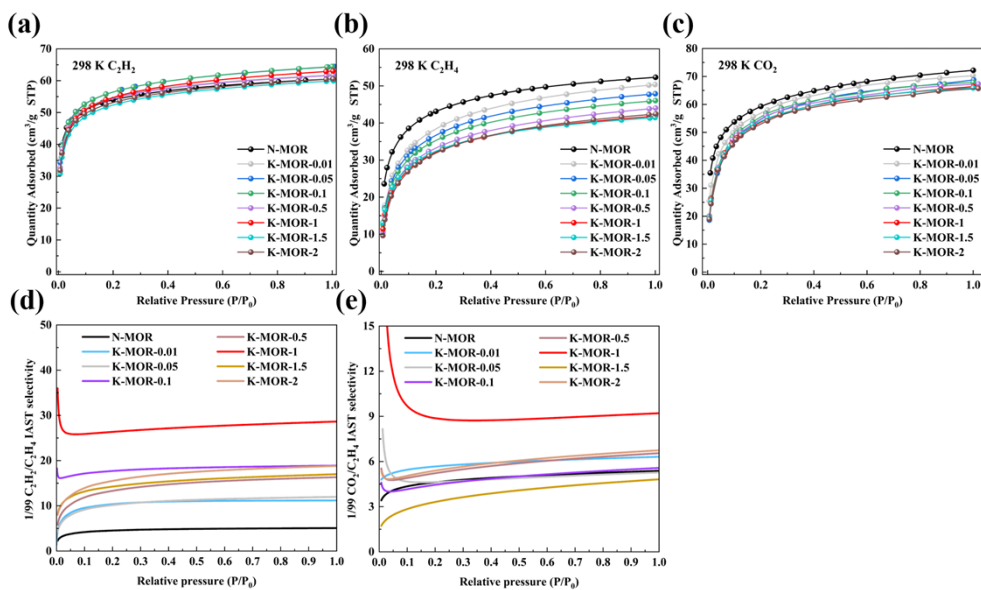

**Fig. S14.** (a)  $\text{C}_2\text{H}_2$ , (b)  $\text{C}_2\text{H}_4$ , and (c)  $\text{CO}_2$  adsorption isotherms of K-MOR-X (X = 0.01, 0.05, 0.1, 0.5, 1.5, and 2) and N-MOR. IAST selectivity for K-MOR-X on (d) 1/99  $\text{C}_2\text{H}_2/\text{C}_2\text{H}_4$  and (e) 1/99  $\text{CO}_2/\text{C}_2\text{H}_4$  mixture.

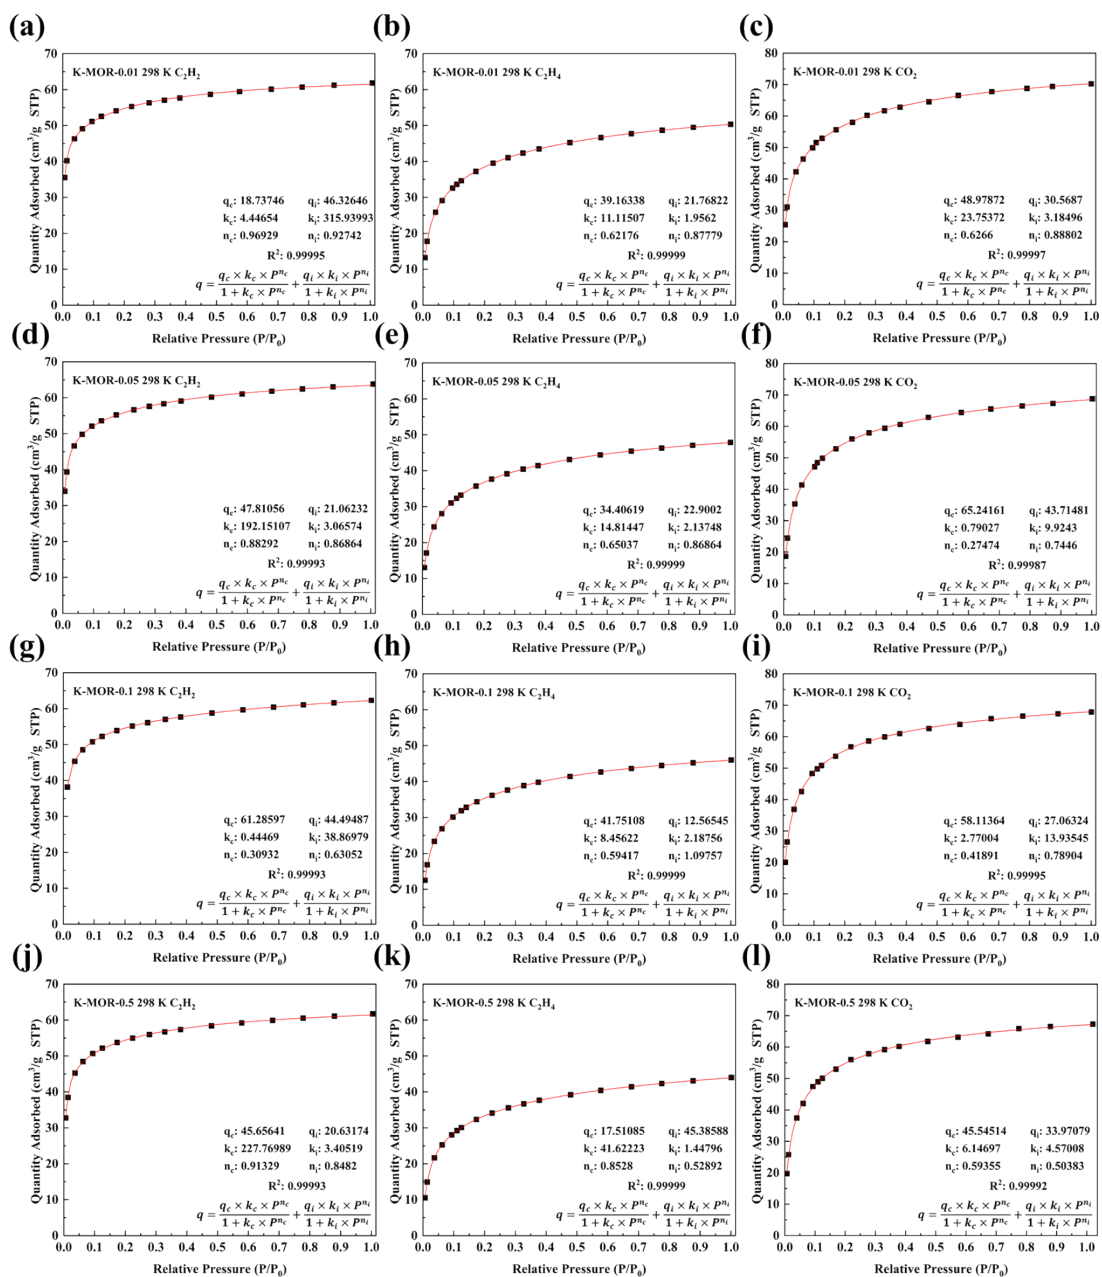

**Fig. S15.** Non-linear fitted curves for the C<sub>2</sub>H<sub>2</sub>, C<sub>2</sub>H<sub>4</sub>, and CO<sub>2</sub> sorption of (a-c) K-MOR-0.01, (d-f) K-MOR-0.05, (g-i) K-MOR-0.1, and (j-l) K-MOR-0.5.

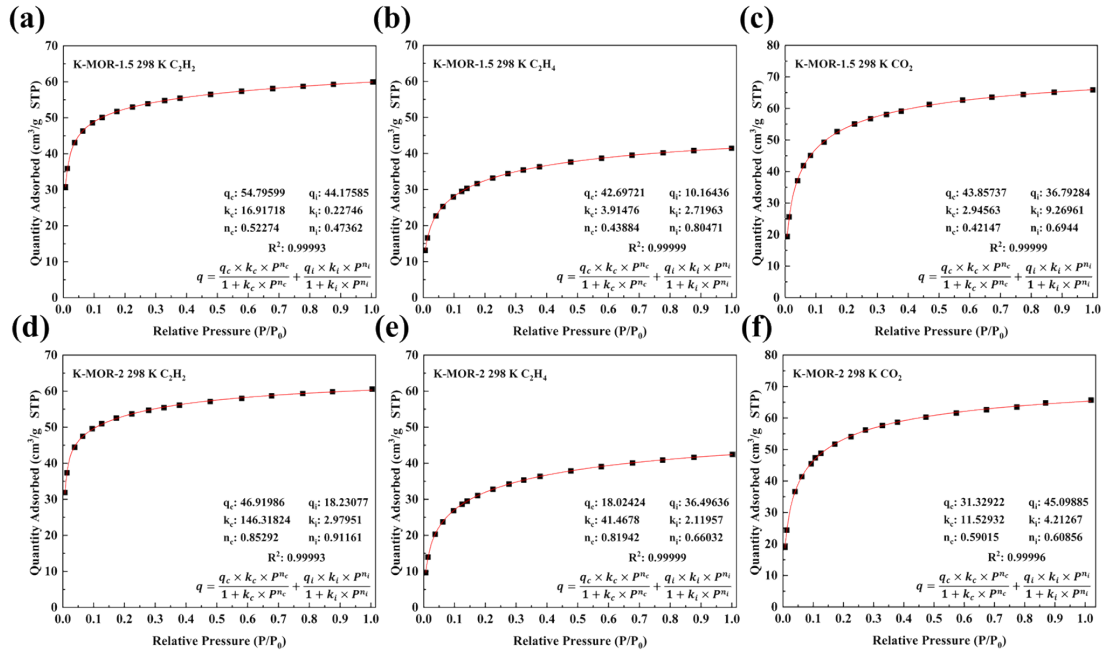

Fig. S16. Non-linear fitted curves for C<sub>2</sub>H<sub>2</sub>, C<sub>2</sub>H<sub>4</sub>, and CO<sub>2</sub> sorption of (a-c) K-MOR-1.5 and (d-f) K-MOR-2.

## Isosteric heat adsorption (Q<sub>st</sub>)

Isotherms for C<sub>2</sub>H<sub>2</sub>, C<sub>2</sub>H<sub>4</sub>, and CO<sub>2</sub> sorption were measured at 298 K, 318 K, and 338 K, these isotherms were initially fitted to the virial equation:

$$\ln P = \ln N + \frac{1}{T} \sum_{i=0}^m a_i N^i + \sum_{i=0}^n b_i N^i$$

Where N is the amount of gas adsorbed at the pressure P, a and b are virial coefficients, m and n are the number of coefficients require to adequately describe the isotherm.

To calculate the Q<sub>st</sub> values, the fitting parameters obtained from equation were then plugged into the following equation:

$$Q_{st} = -R \sum_{i=0}^m a_i N^i$$

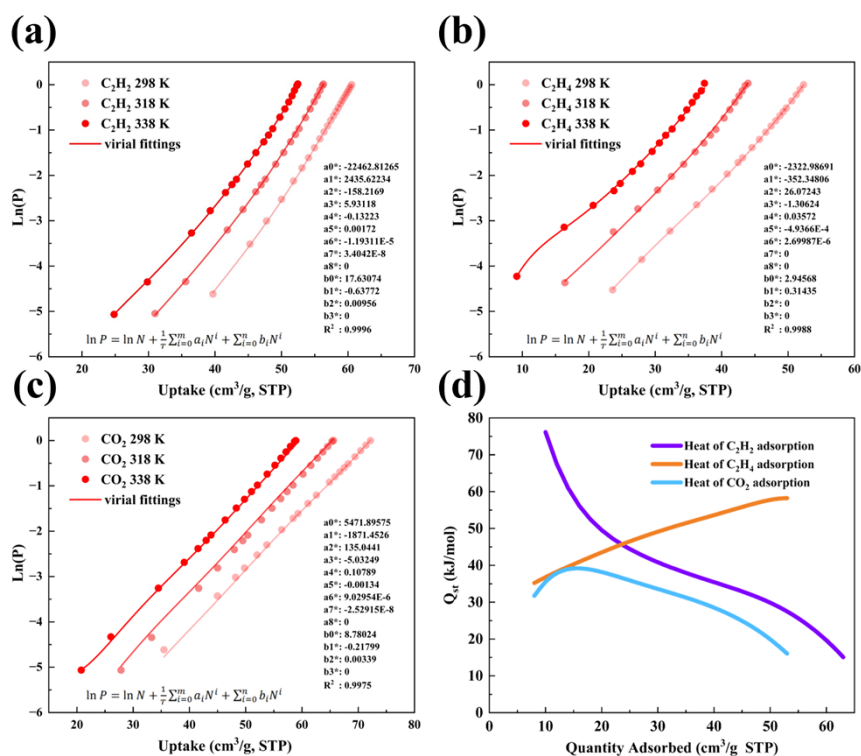

**Fig. S17.** Virial fitting of (a) C<sub>2</sub>H<sub>2</sub>, (b) C<sub>2</sub>H<sub>4</sub>, and (c) CO<sub>2</sub> adsorption of N-MOR, (d) Isosteric heats of adsorption of C<sub>2</sub>H<sub>2</sub>, C<sub>2</sub>H<sub>4</sub>, and CO<sub>2</sub> of N-MOR.

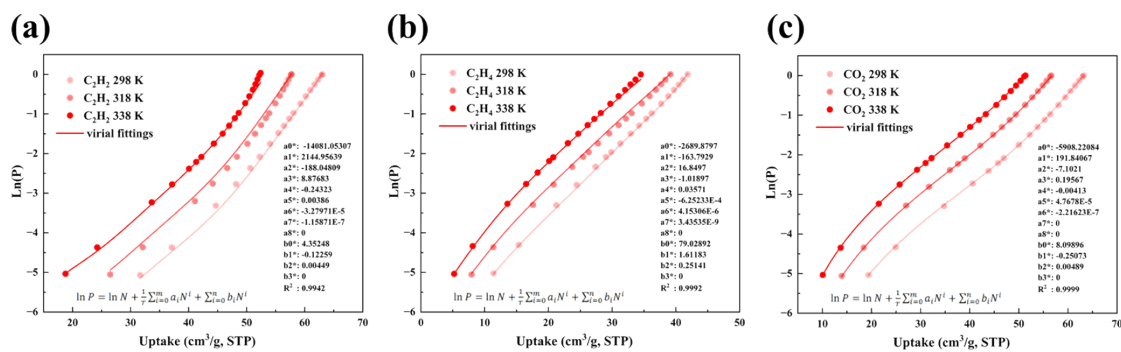

**Fig. S18.** (a-c) Virial fitting of (a) C<sub>2</sub>H<sub>2</sub>, (b) C<sub>2</sub>H<sub>4</sub>, and (c) CO<sub>2</sub> adsorption of K-MOR.



## Breakthrough Experiments

All mixture gases were provided by Jining XieLi Special Gas Co., Ltd, the outlet gas was detected by Agilent GC490 gas chromatography.

Table S3. Detection of gases

| Gas                           | Detection sensitivity | Carrier gas | Detection of the channel |
|-------------------------------|-----------------------|-------------|--------------------------|
| He                            | 10 ppm                | Argon       | Channel-1                |
| CO <sub>2</sub>               | 10 ppm                | Helium      | Channel-2                |
| C <sub>2</sub> H <sub>4</sub> | 10 ppm                | Helium      | Channel-2                |
| C <sub>2</sub> H <sub>6</sub> | 10 ppm                | Helium      | Channel-2                |
| C <sub>2</sub> H <sub>2</sub> | 10 ppm                | Helium      | Channel-2                |

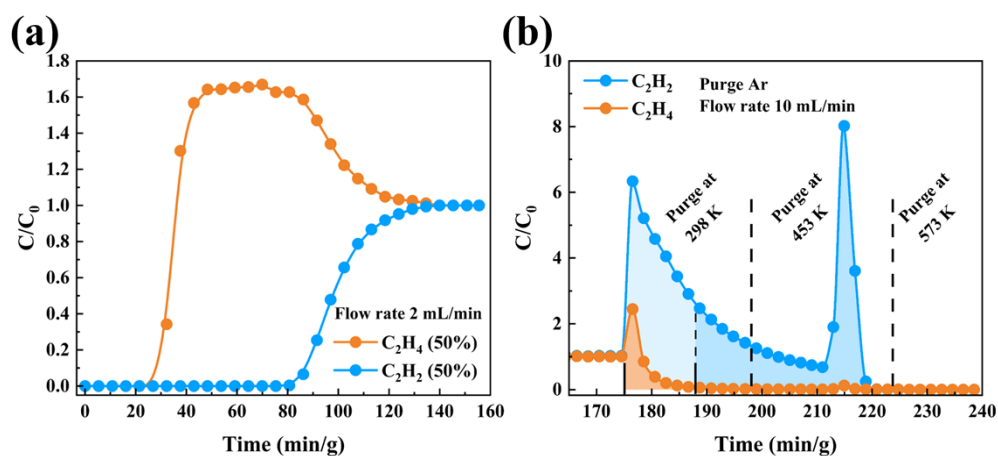

Fig. S19. C<sub>2</sub>H<sub>2</sub>/C<sub>2</sub>H<sub>4</sub> (50/50, v/v) breakthrough experiment: (a) Breakthrough curves, (b) Desorption curves.

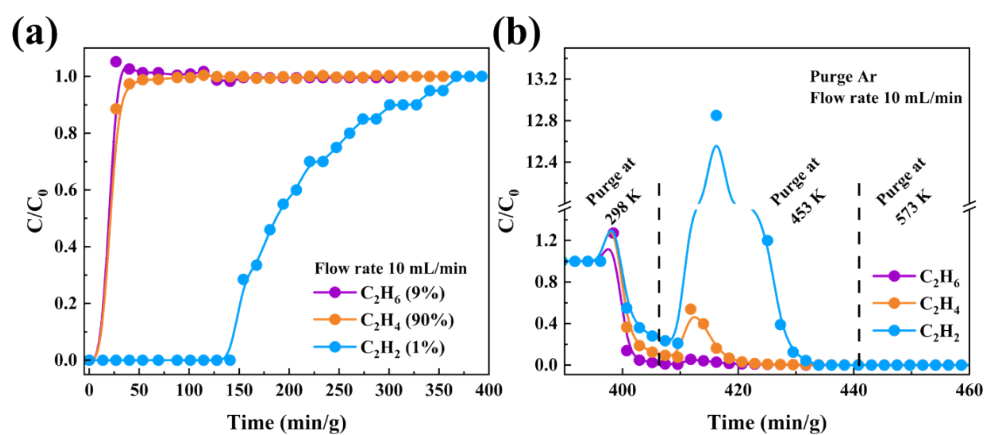

**Fig. S20.**  $C_2H_2/C_2H_4/C_2H_6$  (1/90/9, v/v/v) breakthrough experiment: (a) Breakthrough curves, (b) Desorption curves.

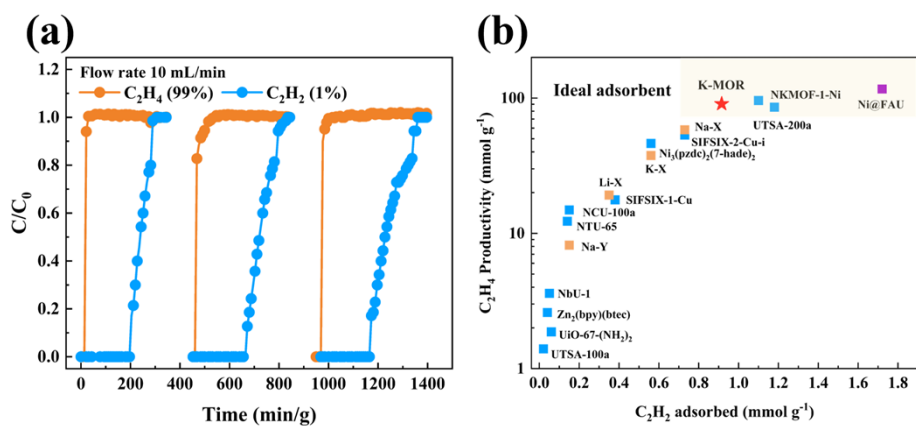

**Fig. S21.** (a)  $C_2H_2/C_2H_4$  (1/99, v/v) cycling breakthrough tests on K-MOR and (b) Comparing with other materials for  $C_2H_4$  productivity.

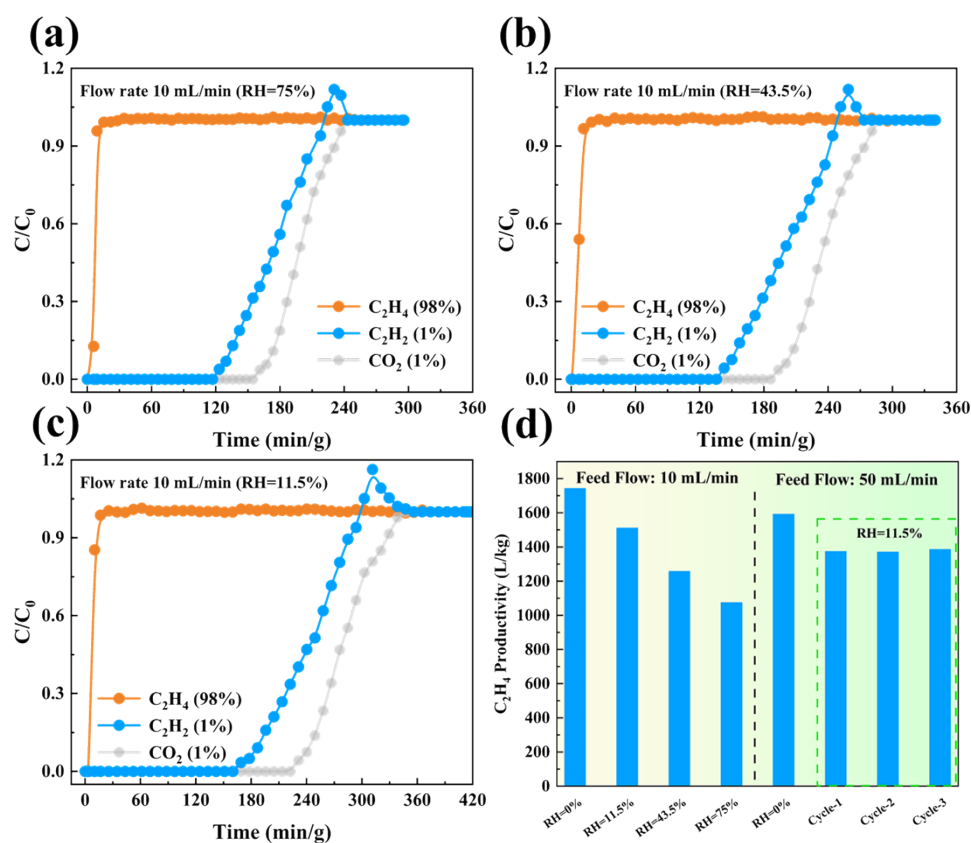

**Fig. S22.** (a-c)  $\text{CO}_2/\text{C}_2\text{H}_2/\text{C}_2\text{H}_4$  (1/1/98, v/v/v) breakthrough experiment under different humidity levels and (d)  $\text{C}_2\text{H}_4$  productivity calculated from these breakthrough experiments.

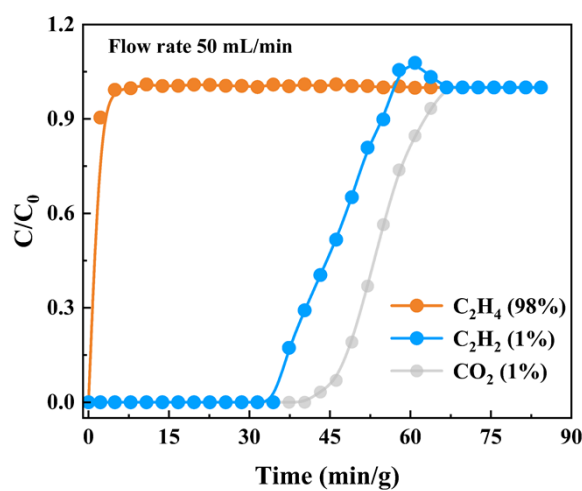

**Fig. S23.**  $\text{CO}_2/\text{C}_2\text{H}_2/\text{C}_2\text{H}_4$  (1/1/98, v/v/v) breakthrough experiment with higher flow rate: 50 mL/min.

**Table S4.** Performance of solid adsorbents in C<sub>2</sub>H<sub>2</sub>/C<sub>2</sub>H<sub>4</sub> (1/99) separation under ambient conditions<sup>1-13</sup>.

| Adsorbent                                                    | Gas flow rate<br>(mL min <sup>-1</sup> ) | C <sub>2</sub> H <sub>2</sub> adsorbed<br>(mmol g <sup>-1</sup> ) | C <sub>2</sub> H <sub>4</sub><br>Productivity<br>(mmol g <sup>-1</sup> ) | Dynamic<br>Selectivity |
|--------------------------------------------------------------|------------------------------------------|-------------------------------------------------------------------|--------------------------------------------------------------------------|------------------------|
| Na-Y                                                         | 10                                       | 0.15                                                              | 8.18                                                                     | 7                      |
| Li-X                                                         | 10                                       | 0.35                                                              | 19.2                                                                     | 21                     |
| Na-X                                                         | 10                                       | 0.73                                                              | 58.3                                                                     | 44                     |
| K-X                                                          | 10                                       | 0.56                                                              | 37.6                                                                     | 34                     |
| SIFSIX-1-Cu                                                  | 1.25                                     | 0.38                                                              | 17.7                                                                     | 11                     |
| SIFSIX-2-Cu-i                                                | 1.25                                     | 0.73                                                              | 53.3                                                                     | 45                     |
| NKMOF-1-Ni                                                   | 10                                       | 1.1                                                               | 96                                                                       | 44                     |
| UTSA-100a                                                    | 2                                        | 0.02                                                              | 1.4                                                                      | 35                     |
| UTSA-200a                                                    | 2                                        | 1.18                                                              | 85.7                                                                     | /                      |
| UTSA-300a                                                    | 2                                        | 0.04                                                              | 0.7                                                                      | 8                      |
| Ni@FAU                                                       | 6                                        | 1.72                                                              | 116.8                                                                    | 97                     |
| NbU-1                                                        | 1                                        | 0.05                                                              | 3.6                                                                      | 10                     |
| ZJU-74a                                                      | 2                                        | 0.13                                                              | 12.2                                                                     | 5                      |
| NTU-65                                                       | 3                                        | 0.14                                                              | 12.3                                                                     | 8                      |
| NCU-100a                                                     | 2                                        | 0.15                                                              | 14.9                                                                     | 30                     |
| TJT-100                                                      | 2                                        | 0.02                                                              | 1.8                                                                      | 8.5                    |
| Ni <sub>3</sub> (pzdc) <sub>2</sub> (7<br>Hade) <sub>2</sub> | 1.5                                      | 0.56                                                              | 46.2                                                                     | 25                     |
| Zn <sub>2</sub> (bpy)(btec)                                  | 1.25                                     | 0.04                                                              | 2.6                                                                      | 19                     |
| UiO-67-(NH <sub>2</sub> ) <sub>2</sub>                       | 1.25                                     | 0.06                                                              | 1.87                                                                     | 1.55                   |
| <b>K-MOR</b>                                                 | <b>10</b>                                | <b>0.915</b>                                                      | <b>90.6</b>                                                              | <b>54</b>              |

## Details of Stimulation

The GCMC simulations were conducted to determine the ideal location of Na<sup>+</sup> and K<sup>+</sup> in the **MOR** structure. The **MOR** framework and cations were treated as rigid bodies, and the fixed loading task and Metropolis method were employed to simulate optimal adsorption sites at 298 K and 1.0 bar. The loading steps, equilibration steps, and production steps were all set to  $1.0 \times 10^7$ . Additionally, optimal adsorption densities for C<sub>2</sub>H<sub>2</sub>, C<sub>2</sub>H<sub>4</sub>, and CO<sub>2</sub> in **MOR** were simulated under the same conditions using the fixed loading task and Metropolis method, loading steps, equilibration steps, and production steps were all set to  $1.0 \times 10^7$ .

The interactions between the skeleton and gases, as well as between gas molecules, were characterized using the standard COMPASS II force field. Atomic partial charges for both the **MOR** framework and gases were used in the simulation, and guest gas molecules were optimized using the DMol3 module.

**Table S5.** Energy of the Different T-Sites of Mordenite<sup>14, 15</sup>.

| T-site | Relative energy (K) |
|--------|---------------------|
| T1     | 3081                |
| T2     | 3072                |
| T3     | 0                   |
| T4     | 1678                |

The reported energy represents the minimum energy state of a structure containing one Al atom (and one Na cation) per unit cell. The structure is considered rigid, and the minimum energy state corresponds to the most favorable location for the extraframework cation<sup>14</sup>.

In addition to experimental studies, computer simulation<sup>15-17</sup> studies were also employed to support the determination of the aluminum distribution in the zeolite framework. These simulations suggested that Al atoms are primarily located in the T3 site, and the simulation results for both experiments and simulations indicate that the order of site occupancy obtained by all methods is as follows: T3 > T4 > T1 > T2.

To ensure a fair comparison, a super unit cell (222) containing 40 Al atoms based on the experimental Si/Al ratio was built, and 40 cations were used as the equilibrium cations. Sorption simulations were then carried out for the same fixed loading of C<sub>2</sub>H<sub>2</sub> (23/U.C, U.C: Unit Cell), C<sub>2</sub>H<sub>4</sub> (23/U.C), and CO<sub>2</sub> (23/U.C) in N-MOR (blank control), and under the loading calculated from C<sub>2</sub>H<sub>2</sub>/C<sub>2</sub>H<sub>4</sub> (50/50, v/v) breakthrough experiment (K<sup>+</sup>: 40/U.C, C<sub>2</sub>H<sub>2</sub>: 64/U.C, C<sub>2</sub>H<sub>4</sub>: 6/U.C), C<sub>2</sub>H<sub>2</sub>/C<sub>2</sub>H<sub>4</sub> (1/99, v/v) breakthrough experiments (K<sup>+</sup>: 40/U.C, C<sub>2</sub>H<sub>2</sub>: 22/U.C, C<sub>2</sub>H<sub>4</sub>: 40/U.C), and CO<sub>2</sub>/C<sub>2</sub>H<sub>2</sub>/C<sub>2</sub>H<sub>4</sub> (1/1/98, v/v/v) breakthrough experiments (K<sup>+</sup>: 40/U.C, C<sub>2</sub>H<sub>2</sub>: 28/U.C, C<sub>2</sub>H<sub>4</sub>: 4/U.C, CO<sub>2</sub>: 35/U.C).

**Table S6.** Aluminum distribution of MOR zeolite with Si/Al ratio equal to 8.6.

| T-site | Amount | Al occupancy |
|--------|--------|--------------|
| T1     | 16     | 0.078125     |
| T2     | 16     | 0.0375       |
| T3     | 8      | 0.26875      |
| T4     | 8      | 0.125        |

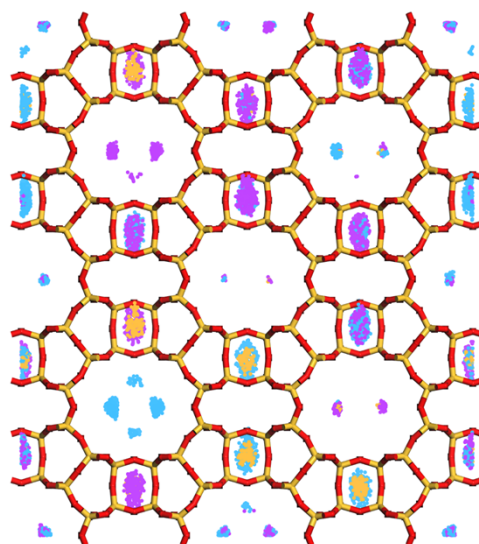

**Fig. S24.** Density distribution of C<sub>2</sub>H<sub>2</sub> (purple), C<sub>2</sub>H<sub>4</sub> (orange), CO<sub>2</sub> (blue), and Na<sup>+</sup> (omitted display) cations in N-MOR under the same fixed loading (Na<sup>+</sup>: 40/U.C, C<sub>2</sub>H<sub>2</sub>: 23/U.C, C<sub>2</sub>H<sub>4</sub>: 23/U.C, CO<sub>2</sub>: 23/U.C).

## Reference

- 1 Y. Chai, X. Han, W. Li, S. Liu, S. Yao, C. Wang, W. Shi, I. da-Silva, P. Manuel, Y. Cheng, L. D. Daemen, A. J. Ramirez-Cuesta, C. C. Tang, L. Jiang, S. Yang, N. Guan and L. Li, *Science*, 2020, **368**, 1002-1006.
- 2 Y. Chen, Y. Du, Y. Wang, R. Krishna, L. Li, J. Yang, J. Li and B. Mu, *AIChE J.*, 2021, **67**, e17152.
- 3 X. Cui, K. Chen, H. Xing, Q. Yang, R. Krishna, Z. Bao, H. Wu, W. Zhou, X. Dong, Y. Han, B. Li, Q. Ren, M. J. Zaworotko and B. Chen, *Science*, 2016, **353**, 141-144.
- 4 Q. Dong, X. Zhang, S. Liu, R. B. Lin, Y. Guo, Y. Ma, A. Yonezu, R. Krishna, G. Liu, J. Duan, R. Matsuda, W. Jin and B. Chen, *Angew. Chem. Int. Ed.*, 2020, **59**, 22756-22762.
- 5 X. W. Gu, J. X. Wang, E. Wu, H. Wu, W. Zhou, G. Qian, B. Chen and B. Li, *J. Am. Chem. Soc.*, 2022, **144**, 2614-2623.
- 6 H. G. Hao, Y. F. Zhao, D. M. Chen, J. M. Yu, K. Tan, S. Ma, Y. Chabal, Z. M. Zhang, J. M. Dou, Z. H. Xiao, G. Day, H. C. Zhou and T. B. Lu, *Angew. Chem. Int. Ed.*, 2018, **57**, 16067-16071.
- 7 B. Li, X. Cui, D. O'Nolan, H. M. Wen, M. Jiang, R. Krishna, H. Wu, R. B. Lin, Y. S. Chen, D. Yuan, H. Xing, W. Zhou, Q. Ren, G. Qian, M. J. Zaworotko and B. Chen, *Adv. Mater.*, 2017, **29**, 1704210.
- 8 J. Li, L. Jiang, S. Chen, A. Kirchon, B. Li, Y. Li and H. C. Zhou, *J. Am. Chem. Soc.*, 2019, **141**, 3807-3811.
- 9 R. B. Lin, L. Li, H. Wu, H. Arman, B. Li, R. G. Lin, W. Zhou and B. Chen, *J. Am. Chem. Soc.*, 2017, **139**, 8022-8028.
- 10 J. Pei, K. Shao, J. X. Wang, H. M. Wen, Y. Yang, Y. Cui, R. Krishna, B. Li and G. Qian, *Adv. Mater.*, 2020, **32**, e1908275.
- 11 Y. L. Peng, T. Pham, P. Li, T. Wang, Y. Chen, K. J. Chen, K. A. Forrest, B. Space, P. Cheng, M. J. Zaworotko and Z. Zhang, *Angew. Chem. Int. Ed.*, 2018, **57**, 10971-10975.
- 12 J. Wang, Y. Zhang, P. Zhang, J. Hu, R. B. Lin, Q. Deng, Z. Zeng, H. Xing, S. Deng and B. Chen, *J. Am. Chem. Soc.*, 2020, **142**, 9744-9751.
- 13 Z. Zhang, S. B. Peh, R. Krishna, C. Kang, K. Chai, Y. Wang, D. Shi and D. Zhao, *Angew. Chem. Int. Ed.*, 2021, **60**, 17198-17204.
- 14 J. L. Schlenker, J. J. Pluth and J. V. Smith, *Mater. Res. Bull.*, 1979, **14**, 751-758.
- 15 M. Jeffroy, C. Nieto-Draghi and A. Boutin, *Chem. Mater.*, 2017, **29**, 513-523.
- 16 A. Vjunov, J. L. Fulton, T. Huthwelker, S. Pin, D. Mei, G. K. Schenter, N. Govind, D. M. Camaioni, J. Z. Hu and J. A. Lercher, *J. Am. Chem. Soc.*, 2014, **136**, 8296-8306.
- 17 B. Liu, E. García-Pérez, D. Dubbeldam, B. Smit and S. Calero, *J. Phys. Chem. C*, 2007, **111**, 10419-10426.
